# Supplementary material for: Gain, not concomitant changes in spatial receptive field properties, improves task performance in a neural network attention model
Source: eLife journal article supplement (doi:10.7554/elife.78392), 2023-05-15
Supplement: supp [file elife-78392-supp-v1.zip]

Archive with 2 entries (2 files):
- elife_poa_e78392_Figure_8_figure_supplement_1.pdf
- elife_poa_e78392_Figure_8_figure_supplement_2.pdf
