# Supplementary figures and images for: Gain, not concomitant changes in spatial receptive field properties, improves task performance in a neural network attention model
Source: eLife journal article supplement (doi:10.7554/elife.78392), 2023-05-15

**a**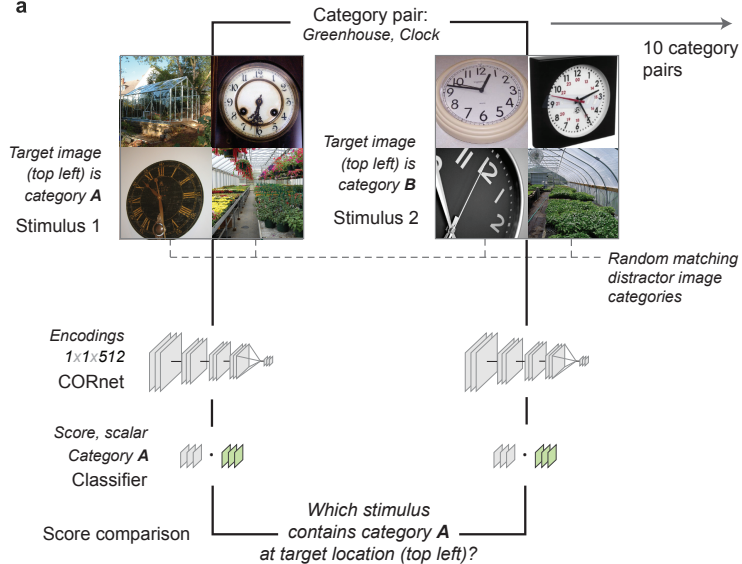**b**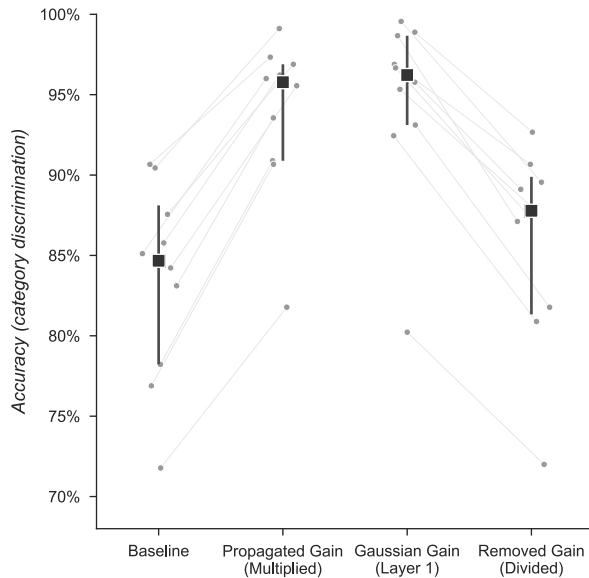

Supplement: supp [file elife-78392-supp-v1.zip]

**a**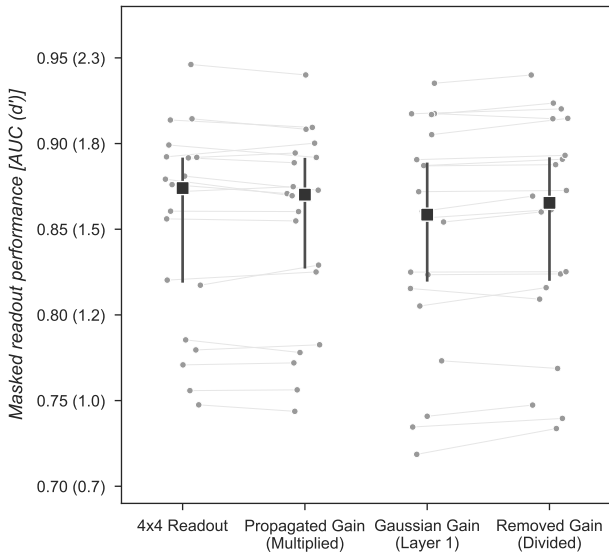

Supplement: supp [file elife-78392-supp-v1.zip]
